# Supplementary material for: Probing the stable G-quadruplex transition using quencher-free end-stacking ethynyl pyrene–adenosine
Source: Royal Society of Chemistry journal article supplement (doi:10.1039/b707278c), 2007-01-01
Supplement: b707278c.pdf [file b707278c.pdf]

## Supplementary Information

# Probing the Stable G-Quadruplex Transition Using Quencher-Free End-Stacking Ethynyl Pyrene-Adenosine

Formatted: Not Highlight

Young Jun Seo, Il Joon Lee, Jeong Wu Yi, and Byeang Hyeon Kim\*

*Department of Chemistry, BK School of Molecular Science  
Pohang University of Science and Technology, Pohang 790-784, Korea*

S2 Table S1. MALDI-TOF mass spectral data.

S3 Figure S1. Melting temperature of ODN S1 and ODN S3

S4 Figure S2. Absorption and fluorescence spectra for ODN S1.

Deleted: S3

Deleted: 2

Formatted: Font: 12 pt

Formatted: Font: 12 pt, Bold

Deleted: with 0.8 M KCl.

**Table S1.** MALDI-TOF mass spectral data

| Sequence  | MALDI-TOF signal [ $M^+$ ] |             |
|-----------|----------------------------|-------------|
|           | Calc. $m/z$                | Found $m/z$ |
| <b>S1</b> | 5263                       | 5266        |
| <b>S2</b> | <u>4726</u>                | <u>4726</u> |
| <b>S3</b> | <u>5039</u>                | <u>5038</u> |

Deleted: ¶

Deleted: ¶

¶

¶

¶

¶

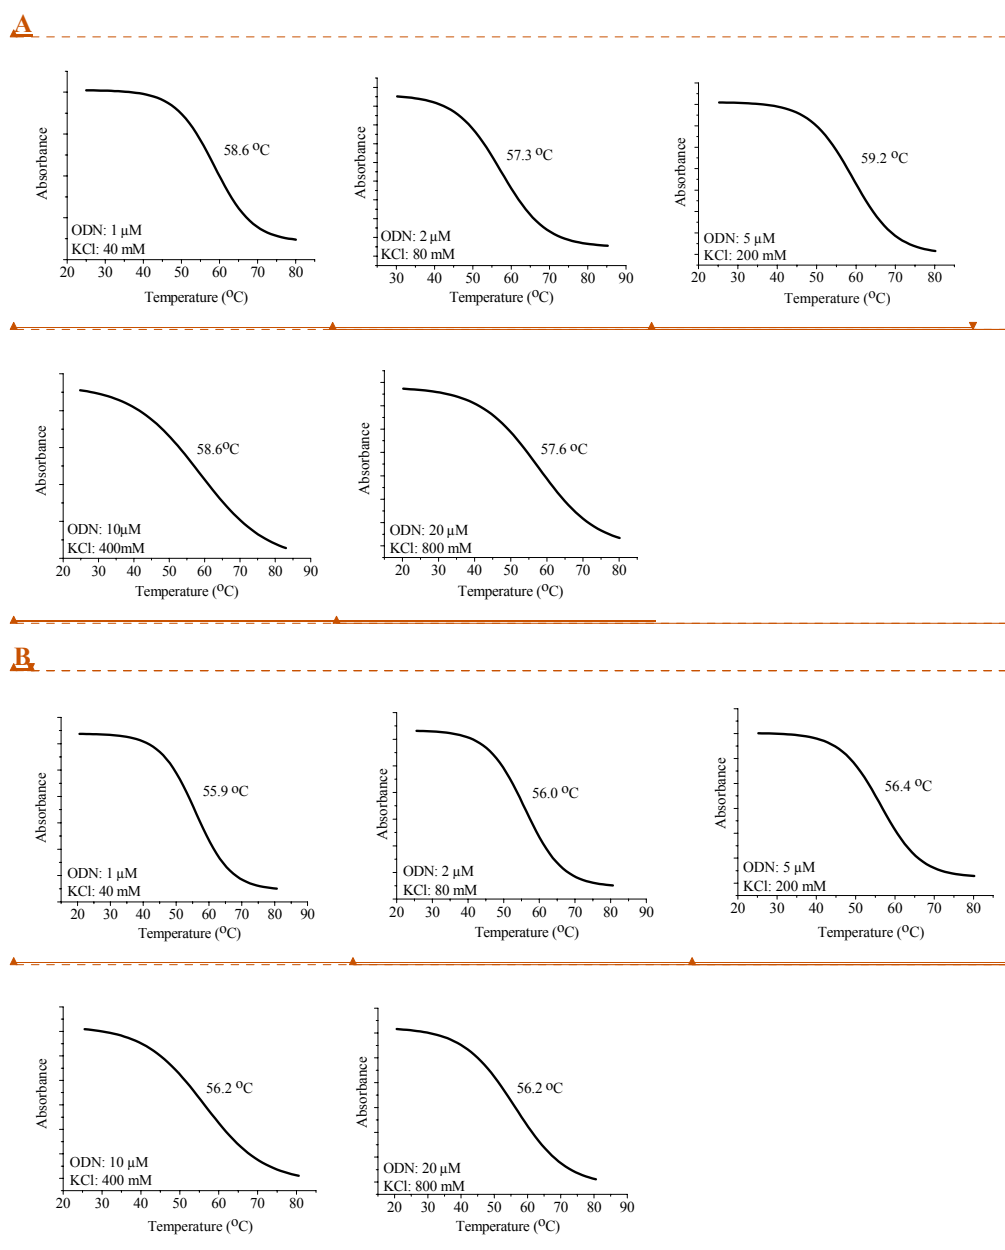

**Figure S1.** Melting temperature of (A) ODN S1 (B) ODN S3 with the diverse concentrations of KCl. All samples were prepared in 5 mM Tris-HCl buffer (pH 7.2), at 20 °C under irradiation at 295 nm.

Formatted: Font: Times New Roman, 11 pt, Bold

Formatted ... [1]

Deleted: <sp>

Formatted ... [2]

Formatted: Font: Times New Roman, 11 pt, Bold

Deleted: ¶

¶

¶

... [3]

Formatted: Font: 11 pt

Formatted ... [4]

Deleted: ¶

<sp>¶

¶

¶

¶

¶

¶

¶

¶

¶

... [5]

Deleted: <sp>

Deleted: ¶

... [6]

Deleted: ¶

... [7]

Formatted ... [8]

Deleted:

Deleted: and

Formatted: Font: 11 pt

Deleted: S3

Deleted: 2... with 0.8 M KCl ... [9]

Formatted: Font: 11 pt

Formatted ... [10]

Deleted: at a concentration of ... [11]

Formatted ... [12]

Deleted: 260

Formatted ... [13]

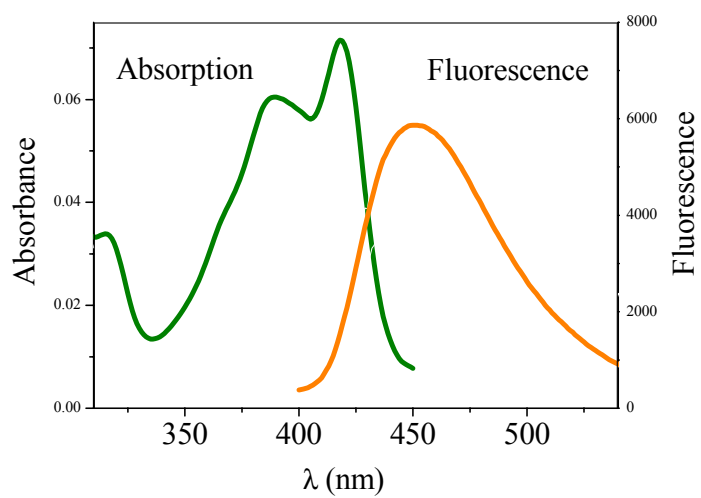

Formatted: Centered

**Figure S2.** Absorption and fluorescence spectra for ODN S1 with no KCl. All samples were prepared in 5 mM Tris-HCl buffer (pH 7.2), at 20 °C.

|                                       |     |                     |
|---------------------------------------|-----|---------------------|
| <b>Page 3: [1] Formatted</b>          | 이일준 | 04/05/2007 21:20:00 |
| TA_Main_Text Char Char Char Char Char |     |                     |
| <b>Page 3: [1] Formatted</b>          | 이일준 | 04/05/2007 21:21:00 |
| TA_Main_Text Char Char Char Char Char |     |                     |
| <b>Page 3: [1] Formatted</b>          | 이일준 | 04/05/2007 21:19:00 |
| TA_Main_Text Char Char Char Char Char |     |                     |
| <b>Page 3: [2] Formatted</b>          | 이일준 | 04/05/2007 21:22:00 |
| TA_Main_Text Char Char Char Char Char |     |                     |
| <b>Page 3: [2] Formatted</b>          | 이일준 | 04/05/2007 21:22:00 |
| TA_Main_Text Char Char Char Char Char |     |                     |
| <b>Page 3: [3] Deleted</b>            | 이일준 | 04/05/2007 21:33:00 |
|                                       |     |                     |
| <b>Page 3: [4] Formatted</b>          | 이일준 | 04/05/2007 21:24:00 |
| TA_Main_Text Char Char Char Char Char |     |                     |
| <b>Page 3: [4] Formatted</b>          | 이일준 | 04/05/2007 21:24:00 |
| TA_Main_Text Char Char Char Char Char |     |                     |
| <b>Page 3: [4] Formatted</b>          | 이일준 | 04/05/2007 21:24:00 |
| TA_Main_Text Char Char Char Char Char |     |                     |
| <b>Page 3: [4] Formatted</b>          | 이일준 | 04/05/2007 21:24:00 |
| TA_Main_Text Char Char Char Char Char |     |                     |
| <b>Page 3: [4] Formatted</b>          | 이일준 | 04/05/2007 21:25:00 |
| TA_Main_Text Char Char Char Char Char |     |                     |
| <b>Page 3: [5] Deleted</b>            | 이일준 | 04/05/2007 21:35:00 |

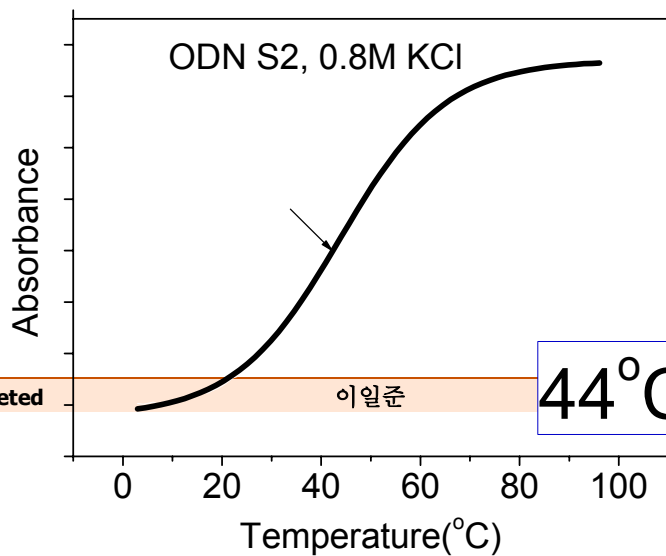

|                            |     |                     |
|----------------------------|-----|---------------------|
| <b>Page 3: [6] Deleted</b> | 이일준 | 04/05/2007 21:35:00 |
|                            |     |                     |
| <b>Page 3: [7] Deleted</b> | 서영준 | 15/01/2007 21:42:00 |

|                                     |     |                            |
|-------------------------------------|-----|----------------------------|
| <b>Page 3: [8] Formatted</b>        | 이일준 | <b>04/05/2007 21:36:00</b> |
| Font: Times New Roman, 11 pt        |     |                            |
| <b>Page 3: [8] Formatted</b>        | 이일준 | <b>04/05/2007 21:36:00</b> |
| Font: Times New Roman, 11 pt        |     |                            |
| <b>Page 3: [8] Formatted</b>        | 이일준 | <b>04/05/2007 21:36:00</b> |
| Font: 11 pt                         |     |                            |
| <b>Page 3: [8] Formatted</b>        | 이일준 | <b>04/05/2007 21:36:00</b> |
| Font: 11 pt                         |     |                            |
| <b>Page 3: [8] Formatted</b>        | 이일준 | <b>04/05/2007 21:36:00</b> |
| Font: 11 pt                         |     |                            |
| <b>Page 3: [8] Formatted</b>        | 이일준 | <b>04/05/2007 21:36:00</b> |
| Font: 11 pt                         |     |                            |
| <b>Page 3: [8] Formatted</b>        | 이일준 | <b>04/05/2007 21:36:00</b> |
| Font: 11 pt                         |     |                            |
| <b>Page 3: [9] Deleted</b>          | 이일준 | <b>09/05/2007 15:09:00</b> |
| 2                                   |     |                            |
| <b>Page 3: [9] Deleted</b>          | 이일준 | <b>04/05/2007 21:38:00</b> |
| with 0.8 M KCl                      |     |                            |
| <b>Page 3: [10] Formatted</b>       | 이일준 | <b>04/05/2007 21:36:00</b> |
| Font: 11 pt                         |     |                            |
| <b>Page 3: [10] Formatted</b>       | 이일준 | <b>04/05/2007 21:36:00</b> |
| Font: 11 pt                         |     |                            |
| <b>Page 3: [10] Formatted</b>       | 이일준 | <b>04/05/2007 21:36:00</b> |
| Font: 11 pt                         |     |                            |
| <b>Page 3: [10] Formatted</b>       | 이일준 | <b>04/05/2007 21:36:00</b> |
| Font: Times New Roman, 11 pt        |     |                            |
| <b>Page 3: [10] Formatted</b>       | 이일준 | <b>04/05/2007 21:36:00</b> |
| Font: 11 pt, (Intl) Times New Roman |     |                            |
| <b>Page 3: [10] Formatted</b>       | 이일준 | <b>04/05/2007 21:36:00</b> |
| Font: 11 pt, (Intl) Times New Roman |     |                            |
| <b>Page 3: [10] Formatted</b>       | 이일준 | <b>04/05/2007 21:36:00</b> |
| Font: 11 pt, (Intl) Times New Roman |     |                            |
